# Supplementary material
Source: PubMed Central journal article supplement (PMC3040901)
Supplement: supp_jn.110.131318_nut131318_T01.pdf [file supp_jn.110.131318_nut131318_T01.pdf]

## **Online Supporting Material**

Supplemental Table 1. Sequence of primers used for real-time PCR.

| <b>Primer</b> | <b>Sequence</b>                                        |
|---------------|--------------------------------------------------------|
| Zip1          | L – GGTCTCTCTGCCAGTTTTTCG<br>R – CAGCATTAAAGGAGGCAGAGG |
| Zip5          | L – GCCAGAGGGAGAACAGACAG<br>R – GTGGCAGAAGACTGCTAGGG   |
| Zip6          | L – TTCCTGTCTCTGCTGGGAGT<br>R – TGTGCTGATGACTTGCATGA   |
| Zip8          | L – AGCCTAACGGACACATCCAC<br>R – AGTACAAGATGCCCAATCG    |
| Zip10         | L – TACCCACCAGCATTTTCACA<br>R – TCACTGTGAGCAACGGAGTC   |
| Zip14         | L – TCAGCCGTGTGCTCACTTAC<br>R – GGTGCTCGTTTTTCTGCTTC   |
| B-actin       | L – AGCCATGTACGTAGCCATCC<br>R – CTCTCAGCTGTGGTGGTGAA   |
